# Supplementary material for: The Moses–Littenberg meta-analytical method generates systematic differences in test accuracy compared to hierarchical meta-analytical models
Source: PubMed Central journal article supplement — J Clin Epidemiol. 2016 Dec;80:77–87. doi: 10.1016/j.jclinepi.2016.07.011 (PMC5176007; doi:10.1016/j.jclinepi.2016.07.011), 2016-12
Supplement: mmc1.pdf [file mmc1.pdf]

Supplementary Figure 1 ROC plots for reviews causing extreme underestimation of DOR with ML models (using unadjusted data)

a. Dijkhuizen et al [25]

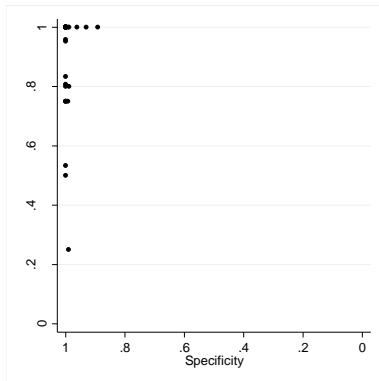

b. Medical Services Advisory Committee [28]

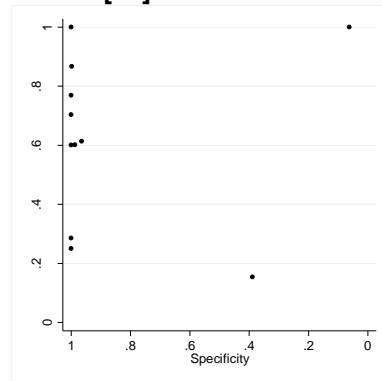

c. Nallamotheu et al [24]

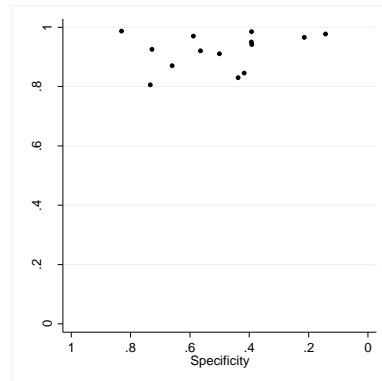

Bricker et al [26]

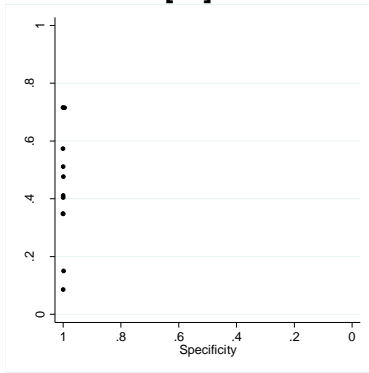

Eden et al [27]

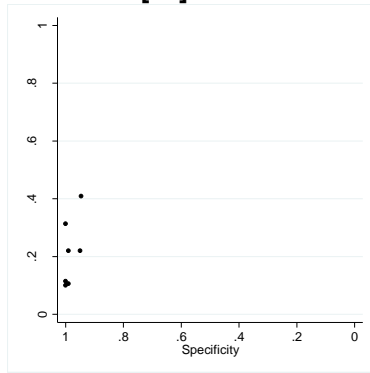

Supplementary Table 1 Review details

| Review details     |                                                          |                                                         |                                                                                                                                                                                                                                             | Review characteristics |                         |              |                             |
|--------------------|----------------------------------------------------------|---------------------------------------------------------|---------------------------------------------------------------------------------------------------------------------------------------------------------------------------------------------------------------------------------------------|------------------------|-------------------------|--------------|-----------------------------|
| Author Year        | Target disorder                                          | Test                                                    | Covariates investigated (no. studies)                                                                                                                                                                                                       | No. studies            | Median sample size (SD) | Range in 'S' | Zero cells (%) <sup>†</sup> |
| Balk 2001[1]       | acute cardiac ischemia                                   | presentation myoglobin                                  | Hospitalised patients (14) vs Emergency Department patients (18)                                                                                                                                                                            | 32                     | 101 (355)               | 7.9          | 3%                          |
| Bricker 2000[2]    | pregnancy                                                | ultrasound                                              | Tertiary (4) vs Primary/Secondary care (7)<br>Second trimester (6) vs Any trimester (5)<br>Low risk (4) vs Unselected (7)                                                                                                                   | 11                     | 7,575 (9,324)           | 5.0          | 2%                          |
| Buchanan 2001[3]   | dangerous severe personality disorder                    | clinical assessment                                     | Prison release (8) vs Community/hospital discharge (13)<br>Time at risk ≤20 months (10) vs >20 months (8)                                                                                                                                   | 21                     | 293 (880)               | 8.0          | 0%                          |
| Chapell 2002[4]    | carpal tunnel syndrome                                   | distal motor latency: symptoms/presented patient groups | Possible age bias (4) vs no bias or not reported (9)<br>Possible bias to easy cases (5) vs no bias (8) †<br>Symptomatic/presented (8) vs unspecified diagnosis (5)                                                                          | 13                     | 85 (115)                | 3.9          | 15%                         |
| Delgado 2003[5]    | detection of primary tumours in patients with metastasis | F18-FDG PET                                             | Any unknown primary tumour (8) vs unknown primary tumour with cervical adenopathies or intra-/extra-cranial metastases (7)                                                                                                                  | 15                     | 20 (12)                 | 6.4          | 18%                         |
| Dijkhuizen 2000[6] | endometrial carcinoma                                    | endometrial sampling                                    | Pre- and post-menopausal women (22) vs post-menopausal women only (7)<br>Asymptomatic only (20) or symptomatic women included (13)                                                                                                          | 33                     | 120 (174)               | 7.8          | 34%                         |
| Eden 2001[7]       | thyroid cancer screening                                 | palpation                                               | Environmental exposure (3) vs medical exposure or unexposed (4)                                                                                                                                                                             | 7                      | 102 (781)               | 3.5          | 11%                         |
| Flemons 2003[8]    | sleep apnoea                                             | sleep monitors                                          | Home setting (13) vs sleep laboratory setting (36) †<br><75% male (10) vs 75-100% male (29)<br>mean Apnea Hypopnea Index ≤30 (15) vs >30 (17)                                                                                               | 49                     | 71 (129)                | 10.1         | 7%                          |
| Flobbe 2002[9]     | breast cancer                                            | mammography                                             | mean body mass index ≤30 (9) vs >30 (25)                                                                                                                                                                                                    | 22                     | 213 (478)               | 5.8          | 0%                          |
| Gifford 2000[10]   | potentially reversible causes of dementia                | clinical assessment                                     | age ≤70 (3) years >70 (8)<br>dementia/memory clinic setting (5) vs other (6) †<br>diagnostic criteria met (6) vs referrals (5)                                                                                                              | 11                     | 202 (108)               | 6.5          | 9%                          |
| Glas 2003[11]      | primary bladder cancer                                   | cytology                                                | <30% Grade 1 tumours (14) vs >30% (6)<br><30% Grade 2 tumours (6) vs >30% (14)<br><30% Grade 3 tumours (8) vs >30% (12) †<br>100% Urological controls (4) vs nonurological patients and/or healthy controls (6) [case-control studies only] | 26                     | 107 (76)                | 7.7          | 9%                          |
| Gould 2001[12]     | lung cancer                                              | FDG-PET                                                 | ≥70% men (14) vs <70% men (14)<br><60 years old (7) versus ≥60 years (17)                                                                                                                                                                   | 35                     | 46 (27)                 | 7.6          | 15%                         |
| Gould 2003[13]     | mediastinal staging of non small cell lung cancer        | PET                                                     | ≥70% men (12) vs <70% men (10)<br><60 years old (4) versus ≥60 years (21)                                                                                                                                                                   | 33                     | 49 (44)                 | 4.5          | 8%                          |

| Review details      |                                                |                                                 |                                                                                                                                                                    | Review characteristics |                         |              |                             |
|---------------------|------------------------------------------------|-------------------------------------------------|--------------------------------------------------------------------------------------------------------------------------------------------------------------------|------------------------|-------------------------|--------------|-----------------------------|
| Author Year         | Target disorder                                | Test                                            | Covariates investigated (no. studies)                                                                                                                              | No. studies            | Median sample size (SD) | Range in 'S' | Zero cells (%) <sup>†</sup> |
| Gray 2000[14]       | oral cancer                                    | toluidine blue dye in visual screening          | Clinical suspicion/lesions (10) vs cancer history (4)                                                                                                              | 14                     | 85 (301)                | 6.5          | 9%                          |
| Ioannidis[15]       | acute myocardial infarction                    | out-of-hospital ECG                             | Symptoms suggestive of acute cardiac ischaemia (4) vs chest pain (6)<br>Age <65 years (3) vs ≥65 (4)<br><65% men (3) vs ≥65% men (4) §                             | 10                     | 295 (439)               | 10.8         | 5%                          |
| Kittler 2002[16]    | melanoma                                       | dermoscopy                                      | Non-melanocytic lesions excluded (4) versus Included (9)                                                                                                           | 13                     | 172 (890)               | 7.6          | 2%                          |
| Koelmay 2001[17]    | peripheral arterial disease - aortoiliac tract | MRA                                             | Age <65 years (9) vs ≥65 (7)<br><70% men (7) vs ≥70% (11)   <br><65% intermittent claudication (5) vs ≥65% (10)                                                    | 19                     | 96 (71)                 | 7.2          | 13%                         |
| MSAC 2002[18]       | fragile X syndrome                             | cytogenetic tests                               | <50% male (6) vs ≥50% male (6)<br>Fragile X pedigree/families (8) vs definite/suspected/prenatal (4)                                                               | 12                     | 77 (176)                | 13.8         | 21%                         |
| Nallamothu 2001[19] | coronary artery disease                        | electron beam computed tomography               | Age <55 years (5) vs ≥55 years (9) ‡<br><65% male (7) vs ≥65% male (7)                                                                                             | 14                     | 104 (63)                | 5.1          | 0%                          |
| Patwardhan 2004[20] | Alzheimer disease dementia                     | PET                                             | Age <70 (11) vs ≥70 years (5)<br>Healthy controls (13) vs diseased controls (6)                                                                                    | 19                     | 43 (31)                 | 8.0          | 5%                          |
| Romagnuolo 2003[21] | biliary disease - detection of stones          | MRI cholangiopancreatography                    | Range possible diagnoses (11) vs stones or cancer diagnoses (35)                                                                                                   | 46                     | 63 (53)                 | 6.4          | 15%                         |
| Sauerland 2004[22]  | pelvic fractures                               | clinical examination                            | Adults (10) vs children (3)                                                                                                                                        | 13                     | 219 (577)               | 7.9          | 8%                          |
| Sotiriadis 2003[23] | Down syndrome                                  | intracardiac echogenic foci                     | Age ≤30 years (4) vs >30 (8)<br>High risk (7) vs low risk/routine (5)                                                                                              | 12                     | 4,308 (4,642)           | 7.9          | 0%                          |
| Varonen 2000[24]    | acute maxillary sinusitis                      | ultrasound                                      | ENT clinic setting (3) vs general clinic (4)                                                                                                                       | 7                      | 156 (74)                | 4.5          | 0%                          |
| Visser 2000[25]     | peripheral arterial disease                    | Duplex ultrasound                               | <=60% men (8) vs >60% (8)<br>Age ≤65 years (8) vs >65 (8)   <br>N America (14) vs other location (7)                                                               | 21                     | 404 (739)               | 6.8          | 4%                          |
| Whitsel 2000[26]    | autonomic failure in diabetes                  | Bazett's heart rate-corrected QT interval (QTc) | Age ≤40 years (8) vs >40 years (8)<br><=50% men (5) vs >50% men (11)   <br><=50% type 1 diabetes (5) vs >50% (10)<br>Mean duration ≤10 years (10) vs >10 years (4) | 17                     | 58 (772)                | 6.7          | 4%                          |

\* range in 'S' is based on values for 'S' from ML model, where  $S = \text{logit}(\text{sensitivity}) + \text{logit}(1 - \text{specificity})$ . 1 – range 3 to <6; range 6 to <8; range 8+

† number of zero false positive and false negative cells as a percentage of the total number of cells per analysis. 1 - <5%; 2 – 5 to 10%; 3 - >10%

‡ model would not converge for HSROC model either with parallel curves or non-parallel curves

§ model would not converge for HSROC model with parallel curves

|| model would not converge for HSROC model either with non-parallel curves
